# Supplementary material for: Post-translational modification analysis of Saccharomyces cerevisiae histone methylation enzymes reveals phosphorylation sites of regulatory potential
Source: PubMed Central journal article supplement (PMC7948420; doi:10.1074/jbc.ra120.015995), 2020-12-20
Supplement: mmc1.pdf [file mmc1.pdf]

# Post-translational modification analysis of *Saccharomyces cerevisiae* histone methylation enzymes reveals phosphorylation sites of regulatory potential

Ryan J. Separovich, Mandy W.M. Wong, Tyler R. Chapman, Eve Slavich, Joshua J. Hamey, Marc R. Wilkins

## Supporting information

**Table S1:** List of modified peptides identified on histone MTases and DMases

**Table S2:** Phosphorylation sites on *S. cerevisiae* histone MTase and DMase enzymes

**Table S3:** Label-free mass spectrometric quantification of phosphorylated peptides and their unmodified counterparts

**Table S4:** Acetylation sites on *S. cerevisiae* histone MTase and DMase enzymes

**Table S5:** Ubiquitination sites on *S. cerevisiae* histone MTase and DMase enzymes

**Table S6:** Plasmids used in this study

**Table S7:** Primers used in this study

**Figure S1:** Histidine-tag affinity purification or enrichment of yeast histone MTases and DMases

**Figure S2:** Annotated mass spectra of novel Dot1p phosphopeptides

**Figure S3:** Extracted ion chromatograms of different H3K36 methylation states in wild-type and *SET2* mutant yeast strains

**Figure S4:** Statistical comparison of H3K36 methylation levels across *SET2* mutants using ordinal regression and adjacent category models

**Figure S5:** Annotated mass spectra of novel Jhd1p ubiquitination sites and of 'pseudo' Set2p ubiquitination site

**Figure S6:** Examples of potential PTM crosstalk

Supplementary tables

Table S2: Phosphorylation sites on *S. cerevisiae* histone MTase and DMase enzymes

| Enzyme       | Phosphorylation site | Reference        |
|--------------|----------------------|------------------|
| <b>Set1p</b> | T504                 | (1)              |
|              | S625                 | (2)              |
|              | T653                 | (3)              |
|              | S655                 | (3)              |
|              | T659                 | (4)              |
|              | S701                 | (4)              |
|              | T704                 | (1)              |
|              | T705                 | (4)              |
|              | S708                 | (1)              |
|              | T785                 | (5)              |
|              | T787                 | (1)              |
|              | T875                 | (5)              |
|              | T1001                | (1)              |
|              | T1006                | (1)              |
| <b>Set2p</b> | S6                   | This study, (6)  |
|              | S8                   | This study, (6)  |
|              | S10                  | This study, (6)  |
|              | T37                  | This study       |
|              | T127                 | (7)              |
|              | T429                 | This study       |
|              | S516                 | This study, (8)  |
|              | T518                 | (4)              |
|              | S522                 | This study, (5)  |
|              | S524                 | This study       |
|              | T531                 | This study       |
|              | S543                 | This study, (4)  |
|              | S572                 | (4)              |
|              | S585                 | (4)              |
|              | S718                 | This study, (4)  |
|              | S719                 | This study       |
|              | S726                 | (1)              |
| S730         | (1)                  |                  |
| <b>Set5p</b> | S13                  | This study, (9)  |
|              | S16                  | This study       |
|              | S26                  | (10)             |
|              | T90                  | (10)             |
|              | T94                  | (9)              |
|              | S96                  | (9)              |
|              | S134                 | (4)              |
|              | S281                 | This study       |
|              | S285                 | This study       |
|              | S288                 | This study       |
|              | T297                 | This study       |
|              | S301                 | This study, (10) |
|              | T305                 | (10)             |
|              | S458                 | This study, (5)  |
|              | S461                 | This study, (11) |
|              | S462                 | (9)              |
|              | S466                 | (9)              |
| S469         | (9)                  |                  |
| T470         | (9)                  |                  |

| <b>Enzyme</b>        | <b>Phosphorylation site</b> | <b>Reference</b> |
|----------------------|-----------------------------|------------------|
| <b>Set5p (cont.)</b> | S475                        | This study, (2)  |
|                      | S476                        | This study, (2)  |
|                      | T504                        | (10)             |
|                      | T511                        | (9)              |
|                      | S512                        | This study, (9)  |
|                      | S517                        | This study, (11) |
|                      | S520                        | (10)             |
| <b>Dot1p</b>         | S14                         | This study       |
|                      | S19                         | This study       |
|                      | S24                         | This study       |
|                      | S30                         | This study       |
|                      | S44                         | (1)              |
|                      | S46                         | (2)              |
|                      | S74                         | This study       |
|                      | T145                        | This study       |
|                      | S174                        | This study       |
|                      | S176                        | This study       |
|                      | T208                        | This study       |
|                      | S219                        | This study, (5)  |
|                      | T223                        | (12)             |
|                      | S227                        | This study       |
|                      | S565                        | This study       |
| T576                 | This study, (13)            |                  |
| Y580                 | (13)                        |                  |
| <b>Jhd1p</b>         | S44                         | This study       |
| <b>Jhd2p</b>         | S212                        | This study       |
|                      | S266                        | This study, (4)  |
|                      | S274                        | This study, (11) |
|                      | S340                        | This study       |
|                      | S711                        | This study       |
| <b>Rph1p</b>         | S124                        | This study       |
|                      | S139                        | (14)             |
|                      | S378                        | (3)              |
|                      | T381                        | This study, (3)  |
|                      | T399                        | This study, (6)  |
|                      | S405                        | (4)              |
|                      | S410                        | (3)              |
|                      | T411                        | (11)             |
|                      | S412                        | This study, (15) |
|                      | S425                        | (13)             |
|                      | S426                        | This study, (13) |
|                      | S429                        | This study, (16) |
|                      | S430                        | This study, (5)  |
|                      | S434                        | (7)              |
|                      | S458                        | (8)              |
|                      | S459                        | This study, (15) |
|                      | T480                        | (6)              |
|                      | S497                        | This study, (4)  |
|                      | S501                        | This study, (4)  |
|                      | S511                        | This study       |
| S552                 | (17)                        |                  |
| S555                 | (17)                        |                  |
| S557                 | This study, (15)            |                  |
| S561                 | This study, (5)             |                  |

| <b>Enzyme</b>        | <b>Phosphorylation site</b> | <b>Reference</b> |                 |
|----------------------|-----------------------------|------------------|-----------------|
| <b>Rph1p (cont.)</b> | S575                        | This study, (5)  |                 |
|                      | S584                        | This study, (6)  |                 |
|                      | S587                        | (18)             |                 |
|                      | S588                        | (4)              |                 |
|                      | S590                        | This study, (1)  |                 |
|                      | S626                        | (4)              |                 |
|                      | S652                        | This study, (15) |                 |
|                      | T656                        | This study       |                 |
|                      | S659                        | This study, (3)  |                 |
|                      | S668                        | This study, (12) |                 |
|                      | S688                        | This study, (11) |                 |
|                      | S689                        | This study, (5)  |                 |
|                      | <b>Gis1p</b>                | T65              | (8)             |
|                      |                             | S70              | This study, (5) |
| S109                 |                             | (4)              |                 |
| S115                 |                             | (4)              |                 |
| S132                 |                             | (4)              |                 |
| S343                 |                             | This study, (15) |                 |
| S351                 |                             | This study, (4)  |                 |
| T353                 |                             | (4)              |                 |
| S365                 |                             | (4)              |                 |
| S373                 |                             | (6)              |                 |
| S374                 |                             | (1)              |                 |
| T405                 |                             | This study, (5)  |                 |
| S421                 |                             | (12)             |                 |
| S424                 |                             | (8)              |                 |
| S425                 |                             | This study, (5)  |                 |
| S580                 |                             | (5)              |                 |
| S670                 |                             | This study, (4)  |                 |
| S690                 |                             | (6)              |                 |
| S694                 |                             | (15)             |                 |
| S696                 |                             | This study, (15) |                 |
| S734                 |                             | This study, (6)  |                 |
| S745                 |                             | (11)             |                 |
| S747                 |                             | This study, (11) |                 |
| S838                 |                             | (7)              |                 |
| T844                 |                             | (7)              |                 |
| S858                 |                             | (7)              |                 |

**Table S3: Label-free mass spectrometric quantification of phosphorylated peptides and their unmodified counterparts**

| Enzyme | Phosphosite | Experiment       | Peptide sequence             | Charge | <i>m/z</i> (Da) |            | Relative abundance (%) |             |
|--------|-------------|------------------|------------------------------|--------|-----------------|------------|------------------------|-------------|
|        |             |                  |                              |        | Unmodified      | Phospho    | Unmodified             | Phospho     |
| Set2p  | S6*         | LysargiNase/ETcD | SKNQSVSASEDEKEILNNAEGHKPQ    | 3+     | 965.79535       | 992.45079  | 99.23                  | 0.77        |
|        | S8*         | LysargiNase/ETcD | SKNQSVSASEDEKEILNNAEGHKPQ    | 3+     | 965.79535       | 992.45079  | 92.49                  | 7.51        |
|        | S10*        | LysargiNase/ETcD | SKNQSVSASEDEKEILNNAEGHKPQ    | 3+     | 965.79535       | 992.45079  | 87.37                  | 12.63       |
|        | S516        | Trypsin/HCD      | SNTQVNSPSSSGIPK              | 2+     | 751.8759        | 791.85907  | 98.28                  | 1.72        |
|        | S522        | Asp-N/HCD        | SNTQVNSPSSSGIPKTPGALDSK      | 3+     | 758.05203       | 784.70748  | 91.31                  | 8.69        |
|        | S524*       | Trypsin/HCD      | SNTQVNSPSSSGIPKTPGALDSK      | 3+     | 758.05203       | 784.70748  | 94.84                  | 5.16        |
|        | T531*       | Trypsin/HCD      | SNTQVNSPSSSGIPKTPGALDSK      | 3+     | 758.05203       | 784.70748  | 96.98                  | 3.02        |
|        | S543        | Trypsin/HCD      | KHKLSDEEYER                  | 2+     | 717.3546        | 757.33777  | 96.76                  | 3.24        |
|        | S718        | Trypsin/HCD      | KALALSSASTR                  | 2+     | 552.82221       | 592.80538  | 99.51                  | 0.49        |
|        | S719        | LysargiNase/HCD  | KKALALSSAST                  | 2+     | 538.81914       | 578.8023   | 99.80                  | 0.20        |
|        |             |                  |                              |        | <b>AVERAGE:</b> |            | <b>95.66</b>           | <b>4.34</b> |
| Set5p  | S13*        | LysargiNase/HCD  | KIGTLNDSQSAVHNGTENGSDF       | 2+     | 1203.54384      | 1243.527   | 99.90                  | 0.10        |
|        | S16*        | LysargiNase/HCD  | KIGTLNDSQSAVHNGTENGSDF       | 2+     | 1203.54384      | 1243.527   | 99.96                  | 0.04        |
|        | S281        | Chymo/ETcD       | IKLRDASGIGSTF                | 3+     | 455.58926       | 482.24471  | 99.83                  | 0.17        |
|        | S285        | Asp-N/HCD        | DASGIGSTFLLNGTTVHTEEES       | 2+     | 1176.54552      | 1216.52868 | 99.94                  | 0.06        |
|        | S288        | Asp-N/HCD        | DASGIGSTFLLNGTTVHTEEES       | 2+     | 1176.54552      | 1216.52868 | 99.91                  | 0.09        |
|        | T297*       | LysargiNase/HCD  | RDASGIGSTFLLNGTTVHTEEESDNGTK | 3+     | 1008.4778       | 1035.13324 | 99.81                  | 0.19        |
|        | S301*       | LysargiNase/HCD  | RDASGIGSTFLLNGTTVHTEEESDNGTK | 3+     | 1008.4778       | 1035.13324 | 99.45                  | 0.55        |
|        | S458*       | Trypsin/HCD      | NADANLGVKIDSNDSSSEDGSKK      | 2+     | 798.37361       | 825.02905  | 88.59                  | 11.41       |
|        | S461*       | Trypsin/HCD      | NADANLGVKIDSNDSSSEDGSKK      | 2+     | 798.37361       | 825.02905  | 89.66                  | 10.34       |
|        | S475        | Trypsin/HCD      | KSSMREAQPDLEILK              | 4+     | 473.00948       | 493.00106  | 96.74                  | 3.26        |
|        | S476        | Asp-N/ETcD       | DSSSEDGSKKSTGNRKSSMREAQP     | 3+     | 828.05774       | 854.71318  | 96.37                  | 3.63        |
|        | S512        | Asp-N/ETcD       | DTQGNVRKTSVRF                | 3+     | 503.27071       | 529.92615  | 99.69                  | 0.31        |
|        | S517        | LysargiNase/HCD  | RFDSNVSVAVDE                 | 2+     | 669.32023       | 709.3034   | 99.02                  | 0.98        |
|        |             |                  |                              |        | <b>AVERAGE:</b> |            | <b>97.61</b>           | <b>2.39</b> |
| Dot1p  | S14         | Asp-N/HCD        | DSFIMSSPNL                   | 2+     | 563.75789       | 603.74105  | 99.58                  | 0.42        |
|        | S19*        | Chymo/HCD        | IMSSPNLDSQESSISPIDEK         | 2+     | 1097.01501      | 1136.99817 | 90.23                  | 9.77        |
|        | S30*        | Chymo/HCD        | IMSSPNLDSQESSISPIDEK         | 2+     | 1097.01501      | 1136.99817 | 89.41                  | 10.59       |
|        | S74         | LysargiNase/HCD  | KQVQNLLEEANKYDPIYGSSLPRGFL   | 3+     | 993.85733       | 1020.51278 | 98.64                  | 1.36        |
|        | T145        | Trypsin/ETcD     | TNHKHTPISKQEIDTAR            | 3+     | 659.34846       | 686.0039   | 99.79                  | 0.21        |
|        | S174        | Trypsin/ETcD     | ANKKNDRDSPSSTFVDWNGPCLR      | 3+     | 888.75763       | 915.41307  | 97.79                  | 2.21        |
|        | S176        | Trypsin/ETcD     | KNDRDSPSSTFVDWNGPCLR         | 3+     | 784.36596       | 811.0214   | 98.53                  | 1.47        |
|        | T208        | Trypsin/ETcD     | SHEIYSGTPIQSISLR             | 3+     | 596.64773       | 623.30317  | 99.47                  | 0.53        |
|        | S219        | Trypsin/ETcD     | TNSPQPTSLTSDNDTSSVTTAK       | 3+     | 751.35567       | 778.01111  | 88.86                  | 11.14       |
|        | S227        | Trypsin/HCD      | TNSPQPTSLTSDNDTSSVTTAK       | 3+     | 751.35567       | 778.01111  | 99.11                  | 0.89        |
|        | T576        | Trypsin/HCD      | RNRGTPVKYTR                  | 3+     | 449.92498       | 476.58042  | 90.48                  | 9.52        |
|        |             |                  |                              |        | <b>AVERAGE:</b> |            | <b>95.63</b>           | <b>4.37</b> |

| Enzyme       | Phosphosite | Experiment        | Peptide sequence                 | Charge    | <i>m/z</i> (Da) |                 | Relative abundance (%) |             |
|--------------|-------------|-------------------|----------------------------------|-----------|-----------------|-----------------|------------------------|-------------|
|              |             |                   |                                  |           | Unmodified      | Phospho         | Unmodified             | Phospho     |
| <b>Jhd1p</b> | S44         | Trypsin/HCD       | IHYSNLTSSSEVLSYPNSAK             | 2+        | 1055.5262       | 1095.50937      | 97.90                  | 2.10        |
|              | S212        | Asp-N/HCD         | DQYPKSLLSDDDE                    | 2+        | 705.32518       | 745.30834       | 94.22                  | 5.78        |
| <b>Jhd2p</b> | S266        | Trypsin/HCD       | TILCDSCDKPFHIYCLSPPLER           | 3+        | 907.76596       | 934.42141       | 96.66                  | 3.34        |
|              | S274        | Asp-N/HCD         | DKPFHIYCLSPPLERVPSG              | 3+        | 738.0455        | 764.70094       | 79.34                  | 20.66       |
|              | S340        | Trypsin/HCD       | RSSLTTVKYGADIHNELPGQITGFPTR      | 3+        | 986.85258       | 1013.50803      | 99.27                  | 0.73        |
|              | S711        | Asp-N/HCD         | DELYFTKSLK                       | 2+        | 622.33208       | 662.31524       | 99.76                  | 0.24        |
|              |             |                   |                                  |           |                 | <b>AVERAGE:</b> | <b>93.85</b>           | <b>6.15</b> |
| <b>Rph1p</b> | T381        | LysargiNase/EThcD | KGTPPLNQLPNPAMPLLH               | 3+        | 646.69251       | 673.34795       | 98.90                  | 1.10        |
|              | T399        | Chymo/EThcD       | LHRPTLKEMESSSL                   | 3+        | 548.61889       | 575.27434       | 98.12                  | 1.88        |
|              | S412        | Trypsin/EThcD     | STSPDVGHFSNFK                    | 2+        | 711.83605       | 751.81921       | 84.80                  | 15.20       |
|              | S426        | Trypsin/HCD       | SKSSGVSSPLLSR                    | 2+        | 652.86207       | 692.84523       | 94.46                  | 5.54        |
|              | S429*       | Trypsin/EThcD     | SSGVSSPLLSR                      | 2+        | 545.29857       | 585.28174       | 99.98                  | 0.02        |
|              | S430*       | Trypsin/EThcD     | SSGVSSPLLSR                      | 2+        | 545.29857       | 585.28174       | 91.64                  | 8.36        |
|              | S459        | Trypsin/HCD       | ISSFQEQPLNK                      | 2+        | 645.83806       | 685.82122       | 86.30                  | 13.70       |
|              | S497        | LysargiNase/HCD   | RETSQTAMLTDHEDNIVAMSLTSMANSAASSP | 3+        | 1138.84131      | 1165.49676      | 97.46                  | 2.54        |
|              | S501        | Chymo/HCD         | TSMANSAASSPRLPL                  | 2+        | 759.88267       | 799.86584       | 94.55                  | 5.45        |
|              | S511        | Chymo/EThcD       | SRLNSSNEL                        | 2+        | 510.25944       | 550.24261       | 87.15                  | 12.85       |
|              | S557        | LysargiNase/EThcD | KNISGISHSAPHSPVNPNSLIK           | 3+        | 804.11156       | 830.767         | 88.19                  | 11.81       |
|              | S561        | LysargiNase/EThcD | KNISGISHSAPHSPVNPNSLI            | 3+        | 761.41324       | 788.06868       | 74.08                  | 25.92       |
|              | S575        | Trypsin/EThcD     | VKSPNIVTLNISR                    | 2+        | 720.93028       | 760.91345       | 81.31                  | 18.69       |
|              | S590        | Trypsin/EThcD     | ESSRSPIALNYEAR                   | 3+        | 531.60575       | 558.2612        | 81.81                  | 18.19       |
|              | S652        | Trypsin/HCD       | ESPVETSKSNLILSK                  | 2+        | 816.44616       | 856.42932       | 98.73                  | 1.27        |
|              | S659        | Trypsin/EThcD     | ESPVETSKSNLILSK                  | 3+        | 544.6332        | 571.28864       | 99.47                  | 0.53        |
|              | S668        | Chymo/HCD         | SKVASTRQEDSF                     | 2+        | 677.83351       | 717.81667       | 88.95                  | 11.05       |
|              | S688        | LysargiNase/HCD   | RNDDLKKEQGSSPLNS                 | 3+        | 592.27825       | 618.9337        | 92.43                  | 7.57        |
| S689         | Trypsin/HCD | NDDLKKEQGSSPLNSK  | 3+                               | 582.94287 | 609.59832       | 89.45           | 10.55                  |             |
|              |             |                   |                                  |           | <b>AVERAGE:</b> | <b>90.90</b>    | <b>9.10</b>            |             |
| <b>Gis1p</b> | S70         | Trypsin/HCD       | TIQLDSPIQQQAK                    | 2+        | 735.40156       | 775.38472       | 98.27                  | 1.73        |
|              | S343        | Asp-N/HCD         | DSNESEQRGSITDNDN                 | 2+        | 890.86445       | 930.84761       | 98.84                  | 1.16        |
|              | S351        | LysargiNase/HCD   | RGSITDNDNDLDFQKV                 | 2+        | 861.42629       | 901.40945       | 90.57                  | 9.43        |
|              | T405        | Trypsin/HCD       | STTPNGVNQFLNMNQTISR              | 3+        | 747.03057       | 773.68602       | 93.10                  | 6.90        |
|              | S425        | Trypsin/HCD       | ISSPLLSR                         | 2+        | 436.76363       | 476.7468        | 90.87                  | 9.13        |
|              | S696        | LysargiNase/EThcD | KSPISSFVNDY                      | 2+        | 628.81151       | 668.79468       | 94.70                  | 5.30        |
|              | S734*       | LysargiNase/HCD   | RQNSNNINPLDAGPSFSPLH             | 3+        | 726.6944        | 753.34985       | 96.53                  | 3.47        |
|              | S747*       | LysargiNase/HCD   | RQNSNNINPLDAGPSFSPLH             | 3+        | 726.6944        | 753.34985       | 89.69                  | 10.31       |
|              |             |                   |                                  |           | <b>AVERAGE:</b> | <b>94.07</b>    | <b>5.93</b>            |             |

\* isobaric phosphopeptides in adjacent rows were differentially quantified by their unique chromatographic retention times

**Table S4: Acetylation sites on *S. cerevisiae* histone MTase and DMase enzymes**

| <b>Enzyme</b> | <b>Acetylation site</b> | <b>Reference</b> |
|---------------|-------------------------|------------------|
| <b>Set1p</b>  | K982                    | (19)             |
|               | K3                      | This study       |
|               | K14                     | This study       |
|               | K43                     | This study       |
|               | K55                     | This study       |
|               | K116                    | This study       |
|               | K117                    | This study       |
|               | K126                    | This study       |
|               | K128                    | This study       |
|               | K172                    | This study       |
|               | K215                    | This study       |
|               | K225                    | This study       |
|               | K228                    | This study       |
|               | K329                    | This study       |
|               | K340                    | This study       |
|               | K412                    | This study       |
|               | K428                    | This study       |
|               | K433                    | This study       |
|               | K447                    | This study       |
|               | <b>Set2p</b>            | K450             |
| K459          |                         | This study       |
| K500          |                         | This study       |
| K510          |                         | This study       |
| K530          |                         | This study       |
| K541          |                         | This study       |
| K566          |                         | This study       |
| K574          |                         | This study       |
| K578          |                         | This study       |
| K584          |                         | This study       |
| K598          |                         | This study       |
| K602          |                         | This study       |
| K607          |                         | This study       |
| K620          |                         | This study       |
| K667          |                         | This study       |
| K672          |                         | This study       |
| K675          |                         | This study       |
| K695          |                         | This study       |
| K713          |                         | This study       |
| <b>Set5p</b>  |                         | K6               |
|               | K30                     | This study       |
|               | K99                     | This study       |
|               | K101                    | This study       |
|               | K113                    | This study       |
|               | K130                    | This study       |
|               | K135                    | This study       |
|               | K141                    | This study       |
|               | K144                    | This study       |
|               | K154                    | This study       |
|               | K169                    | This study       |
|               | K178                    | This study       |
|               | K197                    | This study       |
| K200          | This study              |                  |
| K265          | This study              |                  |

| <b>Enzyme</b>        | <b>Acetylation site</b> | <b>Reference</b> |
|----------------------|-------------------------|------------------|
| <b>Set5p (cont.)</b> | K276                    | This study       |
|                      | K306                    | This study       |
|                      | K390                    | This study       |
|                      | K444                    | This study       |
|                      | K445                    | This study       |
|                      | K455                    | This study       |
|                      | K467                    | This study       |
|                      | K485                    | This study       |
| <b>Dot1p</b>         | K50                     | This study       |
|                      | K87                     | This study       |
|                      | K89                     | This study       |
|                      | K99                     | (19)             |
|                      | K143                    | This study       |
|                      | K158                    | This study       |
|                      | K168                    | This study       |
|                      | K238                    | This study       |
|                      | K289                    | This study       |
|                      | K336                    | This study, (19) |
| K443                 | This study              |                  |
| <b>Jhd1p</b>         | K91                     | This study       |
|                      | K437                    | This study       |
| <b>Jhd2p</b>         | K70                     | This study       |
|                      | K93                     | This study       |
|                      | K119                    | This study       |
|                      | K130                    | This study       |
|                      | K147                    | This study       |
|                      | K258                    | This study       |
|                      | K345                    | This study       |
|                      | K504                    | This study       |
|                      | K659                    | (7)              |
|                      | K602                    | This study       |
|                      | K659                    | This study       |
|                      | K676                    | This study       |
|                      | K687                    | This study       |
|                      | K720                    | This study       |
|                      | K725                    | This study       |
| <b>Rph1p</b>         | K3                      | This study       |
|                      | K214                    | This study       |
|                      | K288                    | This study       |
|                      | K424                    | This study       |
|                      | K665                    | (20)             |
|                      | K684                    | (20)             |
|                      | K694                    | (20)             |
|                      | K705                    | This study       |
| <b>Gis1p</b>         | K81                     | This study       |
|                      | K448                    | (20)             |
|                      | K680                    | (20)             |
|                      | K813                    | (20)             |



**Table S5: Ubiquitination sites on *S. cerevisiae* histone MTase and DMase enzymes**

| <b>Enzyme</b> | <b>Ubiquitination site</b> | <b>Reference</b> |
|---------------|----------------------------|------------------|
| <b>Set1p</b>  | K636                       | (21)             |
|               | K637                       | (21)             |
| <b>Dot1p</b>  | K43                        | (12)             |
|               | K50                        | (12)             |
|               | K238                       | (12)             |
| <b>Jhd1p</b>  | K91                        | This study       |
|               | K122                       | This study       |

**Table S6: Plasmids used in this study**

| <b>Plasmid</b>             | <b>Relevant markers</b>                                                                                          | <b>Source</b>                                    |
|----------------------------|------------------------------------------------------------------------------------------------------------------|--------------------------------------------------|
| pEGH- <i>DOT1</i>          | <i>amp<sup>R</sup></i> and <i>URA3</i> selection markers                                                         | Yeast GST Fusion Collection<br>(Gabriel Perrone) |
| pEGH- <i>JHD1</i>          | <i>GAL1</i> promoter                                                                                             |                                                  |
| pEGH- <i>JHD2</i>          | N-terminal hexahistidine and glutathione                                                                         |                                                  |
| pEGH- <i>GIS1</i>          | <i>S</i> -transferase (GST) tags                                                                                 |                                                  |
| BG1805- <i>SET5</i>        | <i>amp<sup>R</sup></i> and <i>URA3</i> selection markers<br><i>GAL1</i> promoter<br>C-terminal hexahistidine tag | Yeast ORF Collection<br>(Daniel Winter)          |
| pD1204- <i>SET2</i>        | <i>amp<sup>R</sup></i> and <i>URA3</i> selection markers                                                         | This study                                       |
| pD1204- <i>RPH1</i>        | <i>GAL1</i> promoter<br>C-terminal hexahistidine tag                                                             |                                                  |
| p426- <i>SET2</i>          | <i>amp<sup>R</sup></i> and <i>URA3</i> selection markers                                                         | This study                                       |
| p426- <i>SET2-S6A</i>      |                                                                                                                  |                                                  |
| p426- <i>SET2-S6D</i>      |                                                                                                                  |                                                  |
| p426- <i>SET2-S8A</i>      |                                                                                                                  |                                                  |
| p426- <i>SET2-S8D</i>      |                                                                                                                  |                                                  |
| p426- <i>SET2-S10A</i>     |                                                                                                                  |                                                  |
| p426- <i>SET2-S10D</i>     |                                                                                                                  |                                                  |
| p426- <i>SET2-S6/8/10A</i> |                                                                                                                  |                                                  |
| p426- <i>SET2-S6/8/10D</i> |                                                                                                                  |                                                  |

**Table S7: Primers used in this study**

| Primer name       | Sequence (5' → 3')*                                                            | Purpose                                                                      |
|-------------------|--------------------------------------------------------------------------------|------------------------------------------------------------------------------|
| SET2-Electra-Fwd  | tacacgtacttagtcgctgaagctcttctATGTCGAAGAACCAAAGT                                | Electra cloning of <i>SET2</i> and <i>RPH1</i> into pD1204 expression vector |
| SET2-Electra-Rev  | aggtacgaactcgattgacggctcttctaccttattagtgatggtgatggtgatgTGATGATGTTGAAGG         |                                                                              |
| RPH1-Electra-Fwd  | tacacgtacttagtcgctgaagctcttctATGACGAACTAATCGCT                                 |                                                                              |
| RPH1-Electra-Rev  | aggtacgaactcgattgacggctcttctaccttattagtgatggtgatggtgatgGTTTAAAGGTGTA           |                                                                              |
| pD1204-check-Fwd  | CTTCTCAAGCAAGGTTTTTCAG                                                         | Confirmation sequencing of pD1204 plasmids                                   |
| pD1204-check-Rev  | ATTGGCAGTAACCTGGCC                                                             |                                                                              |
| p426-Fwd173       | GAGAGTGCACCATAACCACAGC                                                         | Gibson assembly cloning of <i>SET2</i> into p426 shuttle vector              |
| p426-Rev145       | CTGCTCTGATGCCGCATAGT                                                           |                                                                              |
| SET2-Gibson-Fwd   | actatcgggcatcagagcagATGTCGAAGAACCAAAGTGTGAGTGCGTCGGAAGATG                      |                                                                              |
| SET2-Gibson-Rev   | gctgtggtatggtgcactctcTTATGATGATGTTGAAGGTGGAGGA                                 |                                                                              |
| p426-check-Fwd    | CTTGTCTGTAAGCGGATGC                                                            | Confirmation sequencing of p426- <i>SET2</i>                                 |
| p426-check-Rev    | CACCGCATAGGGTAATAACTG                                                          |                                                                              |
| SET2-S6A-Fwd      | TCGAAGAACCAA <sub>gct</sub> GTGAGTGCGTCG                                       | Site-directed mutagenesis of p426- <i>SET2</i>                               |
| SET2-S6A-Rev      | CGACGCACTCAC <sub>gct</sub> TTGGTTCTTCGA                                       |                                                                              |
| SET2-S6D-Fwd      | TCGAAGAACCAA <sub>gac</sub> GTGAGTGCGTCG                                       |                                                                              |
| SET2-S6D-Rev      | CGACGCACTCAC <sub>gac</sub> TTGGTTCTTCGA                                       |                                                                              |
| SET2-S8A-Fwd      | AACCAAAGTGTG <sub>gct</sub> TGCGTCGGAAGAT                                      |                                                                              |
| SET2-S8A-Rev      | ATCTTCCGACGC <sub>gct</sub> CACACTTTGGTT                                       |                                                                              |
| SET2-S8D-Fwd      | AACCAAAGTGTG <sub>gac</sub> GCGTCGGAAGAT                                       |                                                                              |
| SET2-S8D-Rev      | ATCTTCCGACGC <sub>gac</sub> CACACTTTGGTT                                       |                                                                              |
| SET2-S10A-Fwd     | AGTGTGAGTGCG <sub>gcg</sub> GAAGATGAAAAA                                       |                                                                              |
| SET2-S10A-Rev     | TTTTTCATCTTC <sub>gcg</sub> CGCACTCACACT                                       |                                                                              |
| SET2-S10D-Fwd     | AGTGTGAGTGCG <sub>gac</sub> GAAGATGAAAAA                                       |                                                                              |
| SET2-S10D-Rev     | TTTTTCATCTTC <sub>gac</sub> CGCACTCACACT                                       |                                                                              |
| SET2-S6-8-10A-Fwd | TCGAAGAACCAA <sub>gcc</sub> GTG <sub>gcc</sub> GCG <sub>gCc</sub> GAAGATGAAAAA |                                                                              |
| SET2-S6-8-10A-Rev | TTTTTCATCTTC <sub>gGc</sub> CGC <sub>ggc</sub> CAC <sub>ggc</sub> TTGGTTCTTCGA |                                                                              |
| SET2-S6-8-10D-Fwd | TCGAAGAACCAA <sub>gac</sub> GTG <sub>gac</sub> GCG <sub>gac</sub> GAAGATGAAAAA |                                                                              |

| <b>Primer name</b>        | <b>Sequence (5' → 3')*</b>                                                 | <b>Purpose</b>                                                 |
|---------------------------|----------------------------------------------------------------------------|----------------------------------------------------------------|
| SET2-S6-8-10D-Rev         | TTTTTCATCTTCgtcCGCgtcCACgtcTTGGTTCTTCGA                                    | Site-directed mutagenesis of p426- <i>SET2</i>                 |
| SET2-genomic-Fwd          | tagtcgtgctgcaaacctttctcctttcctggttggttttacgtgacATGTCGAAGAAC<br>CAAAGTGTGAG | Amplification of <i>SET2-URA3</i> for homologous recombination |
| SET2-S6A-genomic-Fwd      | tagtcgtgctgcaaacctttctcctttcctggttggttttacgtgacATGTCGAAGAAC<br>CAAgcTG     |                                                                |
| SET2-S6D-genomic-Fwd      | tagtcgtgctgcaaacctttctcctttcctggttggttttacgtgacATGTCGAAGAAC<br>CAAgacGTG   |                                                                |
| SET2-S6-8-10A-genomic-Fwd | tagtcgtgctgcaaacctttctcctttcctggttggttttacgtgacATGTCGAAGAAC<br>CAAgcTG     |                                                                |
| SET2-S6-8-10D-genomic-Fwd | tagtcgtgctgcaaacctttctcctttcctggttggttttacgtgacATGTCGAAGAAC<br>CAAgacGTG   |                                                                |
| SET2-URA3-genomic-Rev     | cttgggacagaaaacgtgaacaagccccaatatgcatgtctggttaaTTAGTTTTGC<br>TGGCCGCA      |                                                                |
| SET2-A-Fwd                | GAGAAGAAGCTGACTTCGACTATTG                                                  | Verify integration of <i>URA3</i> at <i>SET2</i> locus         |
| SET2-D-Rev                | AAAAATAAAGACACTTGAAACGCAC                                                  |                                                                |
| SET2-seq-Fwd              | GTGTGATAGAAAACATGCATAG                                                     | Confirmation sequencing of chromosomal <i>SET2</i>             |
| SET2-mid-seq-Fwd          | AAGACTCAAACAGATGCGGC                                                       |                                                                |
| URA3-seq-Rev              | CGTGCTGCTACTCATCCTAG                                                       |                                                                |

\* *Non-annealing nucleotides are shown in lowercase*

## Supplementary figures

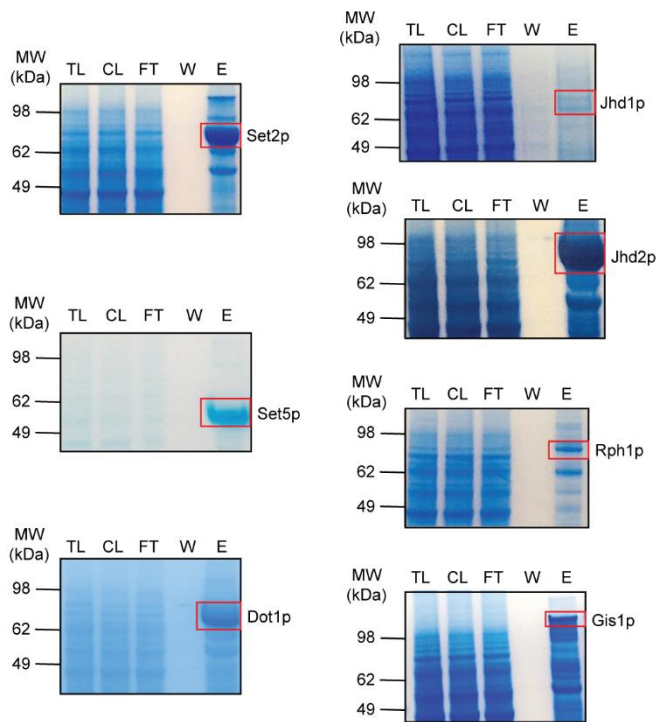

**Figure S1: Histidine-tag affinity purification or enrichment of yeast histone MTases and DMases.** Polyacrylamide gel electrophoresis (PAGE) confirms successful purification and/or enrichment of homologously overexpressed and hexahistidine-tagged histone MTase (left) and DMase (right) enzymes from *S. cerevisiae*. Fractions were collected throughout the purification and electrophoresed: total *S. cerevisiae* (BY4741) lysate (TL), clarified lysate (CL), flow-through (FT), wash (W), and purified eluate (E). The expected sizes for each tagged enzyme is as follows: Set2p = 84 kDa (left, top); Set5p = 61 kDa (left, middle); Dot1p = 92 kDa (left, bottom); Jhd1p = 82 kDa (right, top); Jhd2p = 110 kDa (right, second top); Rph1p = 90 kDa (right, second bottom); Gis1p = 125 kDa (right, bottom).

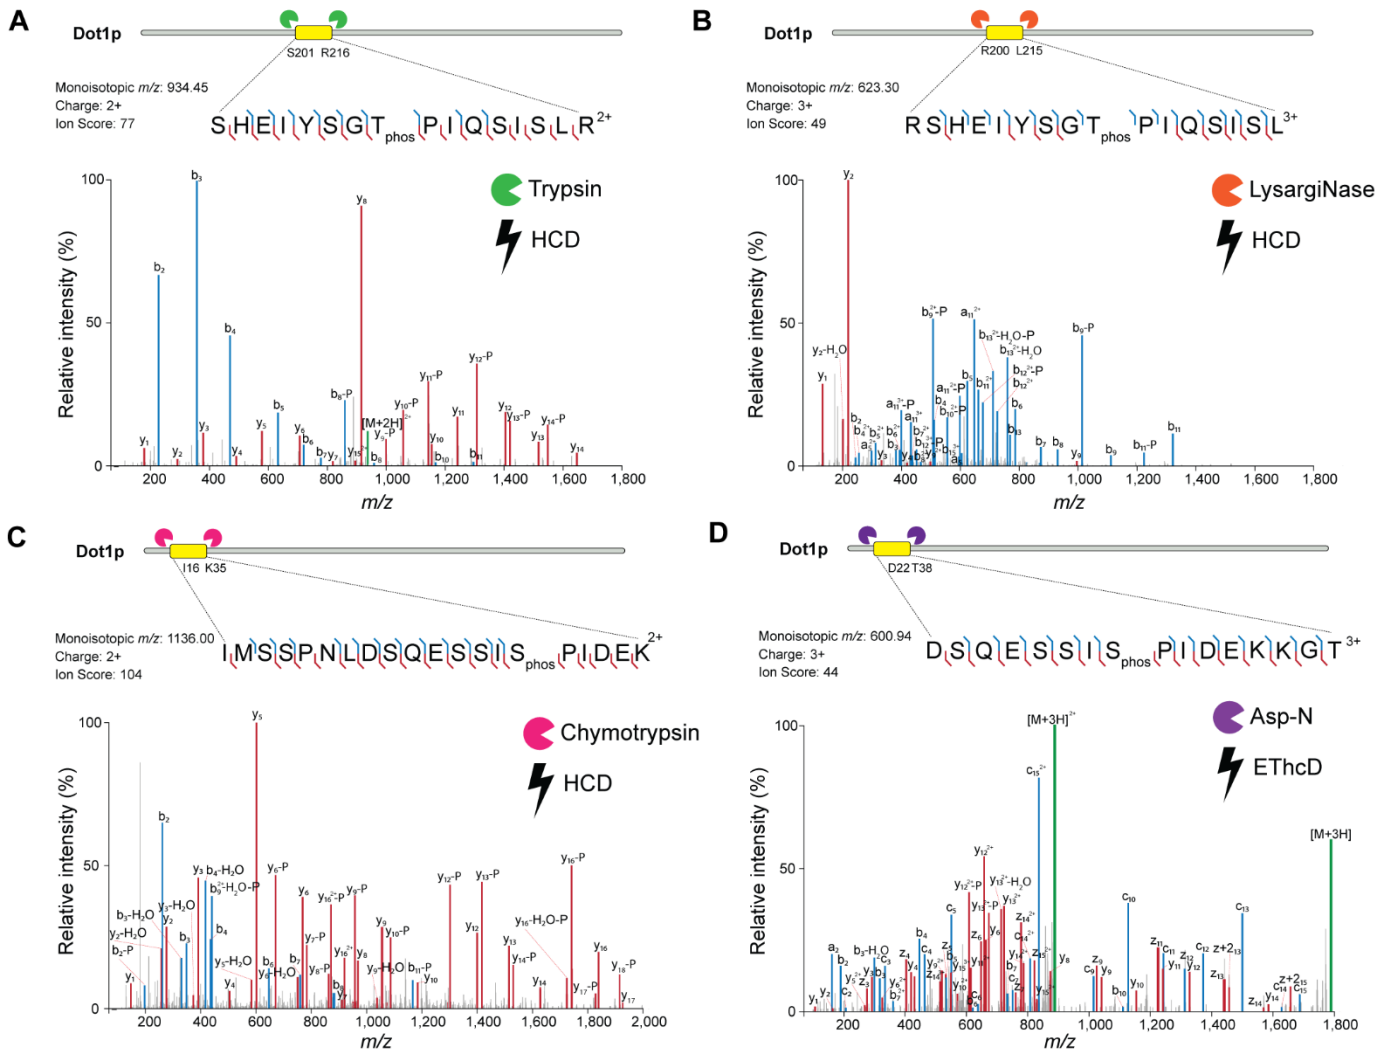

**Figure S2: Annotated mass spectra of novel Dot1p phosphopeptides.** Observed N-terminal and C-terminal fragment ions are shown in blue and red, respectively, while precursor ions are shown in green. Fragment ions with a neutral loss of water and/or phosphoric acid are denoted by  $-H_2O$  and  $-P$ . The proteolytic digestion and fragmentation method used to generate each MS/MS spectrum is shown (middle right of all panels). Fragmentation maps above their corresponding spectra illustrate the unambiguous identification of two exemplar Dot1p phosphorylation sites, not observed previously. (A) HCD fragmentation spectrum for a doubly charged tryptic Dot1p phosphopeptide SHEYSGT<sub>phos</sub>PIQSISLR ( $m/z = 934.45$ , score = 77) identified phosphorylation of threonine 208. (B) HCD fragmentation spectrum for a triply charged lysarginase-generated Dot1p phosphopeptide RSHEYSGT<sub>phos</sub>PIQSISL ( $m/z = 623.30$ , score = 49) independently verified threonine 208 phosphorylation. (C) HCD fragmentation spectrum for a doubly charged chymotryptic Dot1p phosphopeptide IMSSPNLDSQESSIS<sub>phos</sub>PIDEK ( $m/z = 1136.00$ , score = 104) identified phosphorylation of serine 30. (D) EThcD fragmentation spectrum for a triply charged Asp-N generated Dot1p phosphopeptide DSQESSIS<sub>phos</sub>PIDEKKGT ( $m/z = 600.94$ , score = 44) independently verified serine 30 phosphorylation.

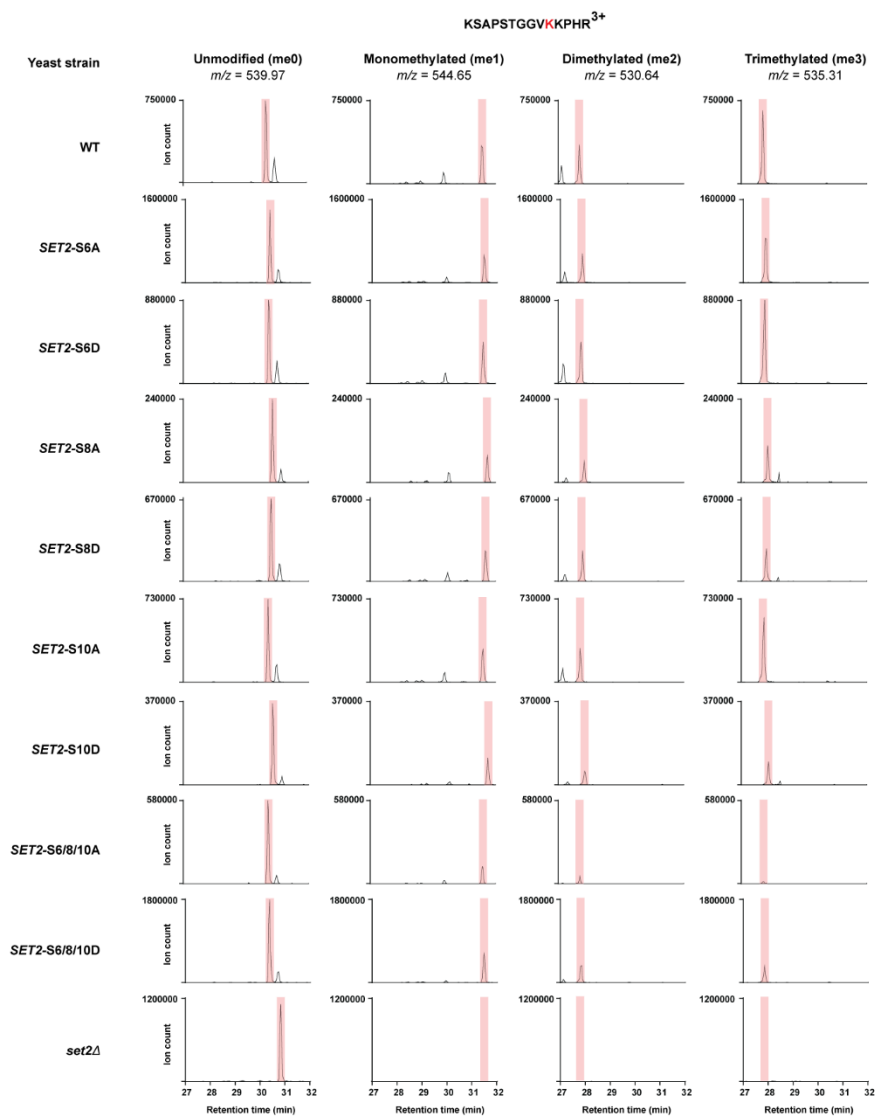

**Figure S3: Extracted ion chromatograms (XICs) of different H3K36 methylation states in wild-type and *SET2* mutant yeast strains.** XICs were generated in the Thermo Xcalibur Qual Browser 2.2 using the  $m/z$  of a triply-charged, K36-containing tryptic peptide in its unmodified (sequence K(propionyl)SAPSTGGV**K(propionyl)**K(propionyl)PHR;  $m/z = 539.97$ ), monomethylated (sequence K(propionyl)SAPSTGGV**K(methyl+propionyl)**K(propionyl)PHR;  $m/z = 544.65$ ), dimethylated (sequence K(propionyl)SAPSTGGV**K(dimethyl)**K(propionyl)PHR;  $m/z = 530.64$ ), and trimethylated (sequence K(propionyl)SAPSTGGV**K(trimethyl)**K(propionyl)PHR;  $m/z = 535.31$ ) forms. Total ion counts were normalised to the most abundant methylation state detected for each mutant. Chromatographic peaks corresponding to the unmodified, mono-, di-, and tri-methylated forms of H3K36 are shaded in coral rectangles. Areas under the curve of shaded peaks were used to quantify the *in vivo* distribution of H3K36 methylation, and represent a single biological replicate included in Figure 7B.

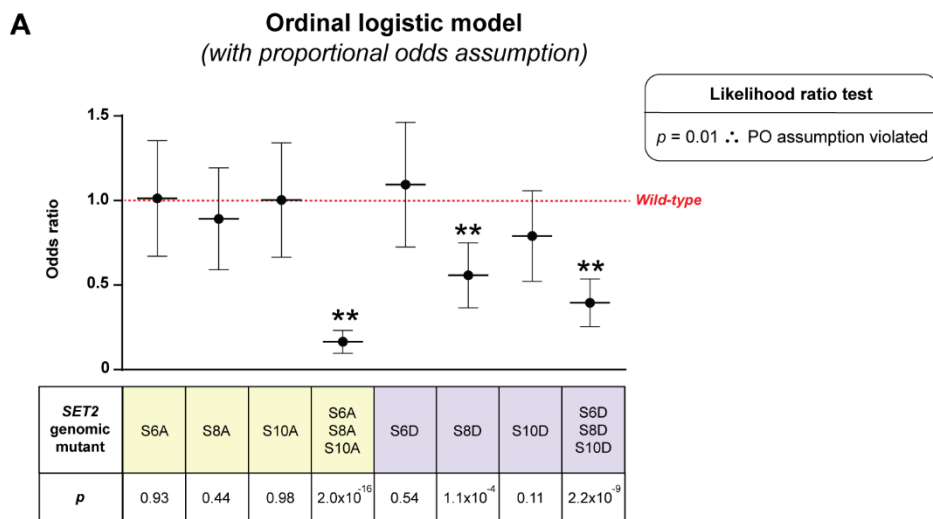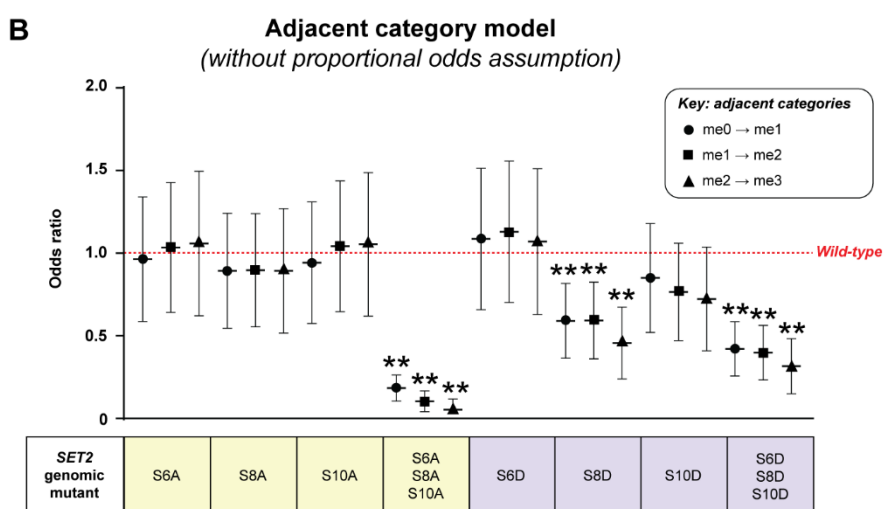

**Figure S4: Statistical comparison of H3K36 methylation levels across *SET2* mutants using ordinal regression (A) and adjacent category (B) models.** For each mutant strain, the odds ratio of H3K36 being more methylated than the wild-type control (normalised to 1.0; dotted red line) was averaged across  $n = 3$  biological replicates, with error bars denoting a 95% confidence interval (\*\*,  $p < 0.01$  versus WT). (A) Ordinal logistic regression modelling of overall changes in H3K36 methylation levels. This regression assumes that the odds of moving between adjacent categories (i.e. methylation states) are equal. For each mutant strain, the statistical significance of alterations in methylation compared to the wild-type control are tabulated as  $p$ -values. The validity of the proportional odds (PO) assumption was checked with a likelihood ratio test. (B) Adjacent category modelling of changes between specific H3K36 methylation states. This model does not assume proportional odds, and fits a separate odds ratio for each pair of adjacent states. The odds ratio of each mutant having H3K36 in a higher adjacent methylation state, with respect to wild-type, is plotted for each pairwise comparison as either circles (unmethylated (me0) to monomethylated (me1)), squares (me1 to dimethylated (me2)), or triangles (me2 to trimethylated (me3)). Outputs from this model are not qualitatively different to those obtained using an ordinal regression approach (A). Thus, we have reported the common odds ratio (per mutant) and its statistical significance from the ordinal logistic model in Fig. 7B.



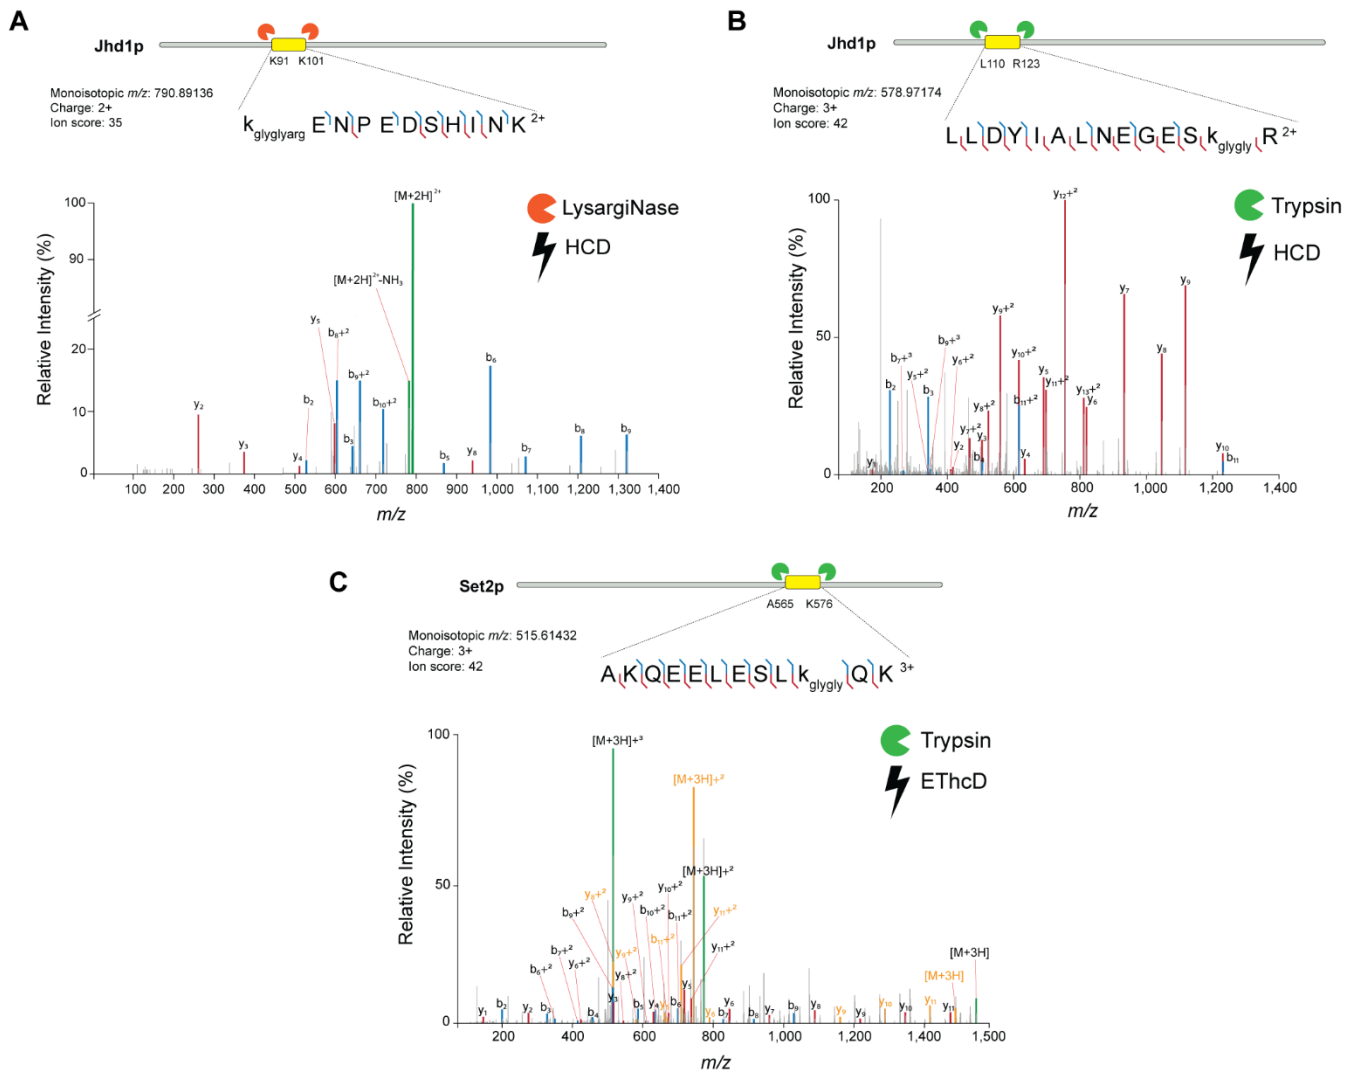

**Figure S5: Annotated mass spectra of novel Jhd1p ubiquitination sites and of ‘pseudo’ Set2p ubiquitination site.** Observed N-terminal and C-terminal fragment ions are shown in blue and red, respectively, while precursor ions are shown in green. Ions with a neutral loss of ammonia are denoted by -NH<sub>3</sub>. The proteolytic digestion and fragmentation method used to generate each MS/MS spectrum is shown (middle right of all panels). Fragmentation maps above their corresponding spectra illustrate the identification of two novel Jhd1p ubiquitination sites. (A) HCD fragmentation spectrum for a double charged, LysargiNase-generated Jhd1p ubiquitinated peptide  $K_{\text{glyglyarg}}ENPEDSHINK$  ( $m/z = 790.89136$ , score = 35) identified ubiquitination of lysine 91. (B) HCD fragmentation spectrum for a double charged tryptic Jhd1p ubiquitinated peptide  $LLDYIALNEGESK_{\text{glygly}}R$  ( $m/z = 578.97174$ , score = 42) identified ubiquitination of lysine 122. (C) EThcD fragmentation spectrum for triply charged, tryptic peptide  $AKQEELESLK_{\text{glygly}}QK$  ( $m/z = 515.61432$ , score = 42) initially identifies lysine 574 as a ubiquitination site. However, the presence of 57 Da neutral losses, peaks shown in yellow, reveal this as a ‘pseudo’ ubiquitination site.

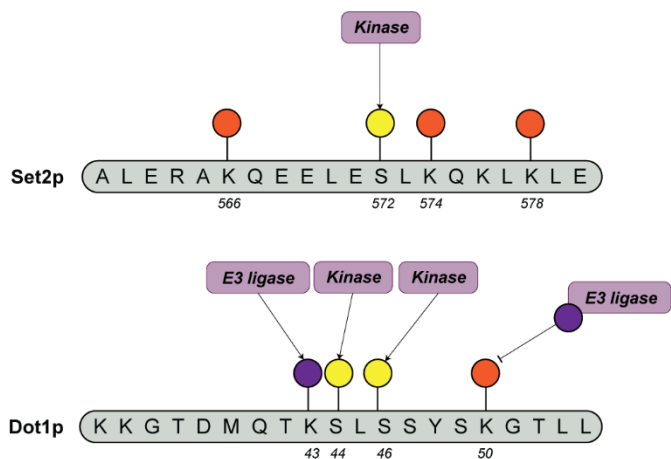

**Figure S6: Examples of potential PTM crosstalk.** Two examples of closely positioned PTMs on Set2p and Dot1p which have the potential to crosstalk with one another. Phosphorylation (yellow), acetylation (orange), and ubiquitination (purple) sites are illustrated on linear sequence maps, with the upstream regulators of unknown identity coloured in mauve. It is possible and likely that these clustered PTMs will affect, either positively or negatively, the subsequent deposition of a modification at a nearby residue.

## Supplementary references

1. Li, J., Paulo, J. A., Nusinow, D. P., Huttlin, E. L., and Gygi, S. P. (2019) Investigation of Proteomic and Phosphoproteomic Responses to Signaling Network Perturbations Reveals Functional Pathway Organizations in Yeast. *Cell Rep.* **29**, 2092-2104. e2094
2. Chi, A., Huttenhower, C., Geer, L. Y., Coon, J. J., Syka, J. E., Bai, D. L., Shabanowitz, J., Burke, D. J., Troyanskaya, O. G., and Hunt, D. F. (2007) Analysis of phosphorylation sites on proteins from *Saccharomyces cerevisiae* by electron transfer dissociation (ETD) mass spectrometry. *P. Natl. Acad. Sci. U.S.A.* **104**, 2193-2198
3. Iesmantavicius, V., Weinert, B. T., and Choudhary, C. (2014) Convergence of ubiquitylation and phosphorylation signaling in rapamycin-treated yeast cells. *Mol. Cell Proteomics* **13**, 1979-1992
4. [preprint] Lanz, M. C., Yugandhar, K., Gupta, S., Sanford, E., Faça, V., Vega, S., Joiner, A., Fromme, C., Yu, H., and Smolka, M. B. (2019) In-depth and 3-Dimensional Exploration of the Budding Yeast Phosphoproteome. *bioRxiv*, 10.1101/700070
5. Albuquerque, C. P., Smolka, M. B., Payne, S. H., Bafna, V., Eng, J., and Zhou, H. (2008) A multidimensional chromatography technology for in-depth phosphoproteome analysis. *Mol. Cell Proteomics* **7**, 1389-1396
6. Holt, L. J., Tuch, B. B., Villén, J., Johnson, A. D., Gygi, S. P., and Morgan, D. O. (2009) Global analysis of Cdk1 substrate phosphorylation sites provides insights into evolution. *Science* **325**, 1682-1686
7. Beltrao, P., Albanèse, V., Kenner, L. R., Swaney, D. L., Burlingame, A., Villén, J., Lim, W. A., Fraser, J. S., Frydman, J., and Krogan, N. J. (2012) Systematic functional prioritization of protein posttranslational modifications. *Cell* **150**, 413-425
8. Helbig, A. O., Rosati, S., Pijnappel, P. W., van Breukelen, B., Timmers, M. H., Mohammed, S., Slijper, M., and Heck, A. J. (2010) Perturbation of the yeast N-acetyltransferase NatB induces elevation of protein phosphorylation levels. *BMC Genomics* **11**, 685
9. Winter, D. L., Hart-Smith, G., and Wilkins, M. R. (2018) Characterization of protein methyltransferases Rkm1, Rkm4, Efm4, Efm7, Set5 and Hmt1 reveals extensive post-translational modification. *J. Mol. Biol.* **430**, 102-118
10. Jaiswal, D., Turniansky, R., Moresco, J. J., Ikram, S., Ramaprasad, G., Akinwale, A., Wolf, J., Yates, J. R., and Green, E. M. (2020) Function of the MYND domain and C-terminal region in regulating the subcellular localization and catalytic activity of the SMYD family lysine methyltransferase Set5. *Mol. Cell Biol.* **40**, e00341-19
11. Bodenmiller, B., Wanka, S., Kraft, C., Urban, J., Campbell, D., Pedrioli, P. G., Gerrits, B., Picotti, P., Lam, H., and Vitek, O. (2010) Phosphoproteomic analysis reveals interconnected system-wide responses to perturbations of kinases and phosphatases in yeast. *Sci. Signal* **3**, rs4
12. Swaney, D. L., Beltrao, P., Starita, L., Guo, A., Rush, J., Fields, S., Krogan, N. J., and Villén, J. (2013) Global analysis of phosphorylation and ubiquitylation cross-talk in protein degradation. *Nat. Methods* **10**, 676-682
13. Huber, A., Bodenmiller, B., Uotila, A., Stahl, M., Wanka, S., Gerrits, B., Aebersold, R., and Loewith, R. (2009) Characterization of the rapamycin-sensitive phosphoproteome reveals that Sch9 is a central coordinator of protein synthesis. *Gene. Dev.* **23**, 1929-1943
14. Chen, S.-h., Albuquerque, C. P., Liang, J., Suhandynata, R. T., and Zhou, H. (2010) A proteome-wide analysis of kinase-substrate network in the DNA damage response. *J. Biol. Chem.* **285**, 12803-12812
15. Smolka, M. B., Albuquerque, C. P., Chen, S.-h., and Zhou, H. (2007) Proteome-wide identification of in vivo targets of DNA damage checkpoint kinases. *P. Natl. Acad. Sci. U.S.A.* **104**, 10364-10369
16. Li, X., Gerber, S. A., Rudner, A. D., Beausoleil, S. A., Haas, W., Villén, J., Elias, J. E., and Gygi, S. P. (2007) Large-scale phosphorylation analysis of  $\alpha$ -factor-arrested *Saccharomyces cerevisiae*. *J. Proteome Res.* **6**, 1190-1197
17. Gnad, F., de Godoy, L. M., Cox, J., Neuhauser, N., Ren, S., Olsen, J. V., and Mann, M. (2009) High-accuracy identification and bioinformatic analysis of in vivo protein phosphorylation sites in yeast. *Proteomics* **9**, 4642-4652
18. Soulard, A., Cremonesi, A., Moes, S., Schütz, F., Jenö, P., and Hall, M. N. (2010) The rapamycin-sensitive phosphoproteome reveals that TOR controls protein kinase A toward some but not all substrates. *Mol. Biol. Cell* **21**, 3475-3486
19. Henriksen, P., Wagner, S. A., Weinert, B. T., Sharma, S., Bačinskaja, G., Rehman, M., Juffer, A. H., Walther, T. C., Lisby, M., and Choudhary, C. (2012) Proteome-wide analysis of lysine acetylation suggests its broad regulatory scope in *Saccharomyces cerevisiae*. *Mol. Cell Proteomics* **11**, 1510-1522
20. Weinert, B. T., Iesmantavicius, V., Moustafa, T., Schölz, C., Wagner, S. A., Magnes, C., Zechner, R., and Choudhary, C. (2014) Acetylation dynamics and stoichiometry in *Saccharomyces cerevisiae*. *Mol. Syst. Biol.* **10**, 833
21. Tong, Z., Kim, M.-S., Pandey, A., and Espenshade, P. J. (2014) Identification of candidate substrates for the Golgi Tul1 E3 ligase using quantitative diGly proteomics in yeast. *Mol. Cell Proteomics* **13**, 2871-2882
